# Supplementary material for: Lymphopenia is Not the Primary Therapeutic Mechanism of Diroximel Fumarate in Relapsing–Remitting Multiple Sclerosis: Subgroup Analyses of the EVOLVE-MS-1 Study
Source: PubMed Central journal article supplement — Neurol Ther. 2024 Jun 27;13(4):1273–85. doi: 10.1007/s40120-024-00637-2 (PMC11263526; doi:10.1007/s40120-024-00637-2), 2024-06-27
Supplement: 40120_2024_637_MOESM1_ESM.pdf [file 40120_2024_637_MOESM1_ESM.pdf]

## SUPPLEMENTARY MATERIAL

### **Lymphopenia is Not the Primary Therapeutic Mechanism of Diroximel Fumarate in Relapsing-Remitting Multiple Sclerosis: Subgroup Analyses of the EVOLVE-MS-1 Study**

**Authors:** Barry A Singer,<sup>1</sup> Sibyl Wray,<sup>2</sup> Mark Gudesblatt,<sup>3</sup> Barbara Bumstead,<sup>3</sup> Tjalf Ziemssen,<sup>4</sup> Ashley Bonnell,<sup>2</sup> Matthew Scaramozza,<sup>5</sup> Seth Levin,<sup>5</sup> Mathura Shanmugasundaram,<sup>5\*</sup> Hailu Chen,<sup>5\*</sup> Jason P Mendoza,<sup>5</sup> James B Lewin,<sup>5</sup> Sai L Shankar<sup>5</sup>

**Affiliations:** <sup>1</sup>The MS Center for Innovations in Care, Missouri Baptist Medical Center, St. Louis, MO, USA; <sup>2</sup>Hope Neurology MS Center, Knoxville, TN, USA; <sup>3</sup>NYU South Shore Neurologic Associates, NY, USA; <sup>4</sup>Center of Clinical Neuroscience, Carl Gustav Carus University Hospital, TU Dresden, Dresden, Germany; <sup>5</sup>Biogen, Cambridge, MA, USA

\*At time of analysis

Corresponding author: Sai L Shankar, PhD, FAAN, Biogen, 225 Binney St., Cambridge, MA 02142 USA; e-mail: [Sai.Shankar@Biogen.com](mailto:Sai.Shankar@Biogen.com)

**Table S1** Demographics and baseline characteristics stratified into quartiles by % ALC decline at week 96 (safety population)

|                                             | Q1<br>(≥ 47% decline)<br><i>n</i> = 198 | Q2<br>(30 to < 47% decline)<br><i>n</i> = 207 | Q3<br>(12 to < 30% decline)<br><i>n</i> = 194 | Q4<br>(< 12% decline)<br><i>n</i> = 202 | All patients <sup>1</sup><br><i>n</i> = 801 |
|---------------------------------------------|-----------------------------------------|-----------------------------------------------|-----------------------------------------------|-----------------------------------------|---------------------------------------------|
| Age, years, mean (SD)                       | 45.4 (10.1)                             | 42.5 (10.5)                                   | 40.4 (11.2)                                   | 41.4 (10.3)                             | 42.4 (10.7)                                 |
| Female, <i>n</i> (%)                        | 139 (70.2)                              | 145 (70.0)                                    | 138 (71.1)                                    | 142 (70.3)                              | 564 (70.4)                                  |
| Race, <i>n</i> (%)                          |                                         |                                               |                                               |                                         |                                             |
| White                                       | 194 (98.0)                              | 197 (95.2)                                    | 184 (94.8)                                    | 177 (87.6)                              | 752 (93.9)                                  |
| Black or African American                   | 2 (1.0)                                 | 7 (3.4)                                       | 8 (4.1)                                       | 22 (10.9)                               | 39 (4.9)                                    |
| Other <sup>2</sup>                          | 2 (1.0)                                 | 3 (1.4)                                       | 2 (1.0)                                       | 3 (1.5)                                 | 10 (1.2)                                    |
| Ethnicity, <i>n</i> (%)                     |                                         |                                               |                                               |                                         |                                             |
| Hispanic or Latino                          | 8 (4.0)                                 | 10 (4.8)                                      | 4 (2.1)                                       | 4 (2.0)                                 | 26 (3.2)                                    |
| BMI, kg/m <sup>2</sup> , mean (SD)          | 26.8 (5.6)                              | 26.3 (6.0)                                    | 25.6 (5.6)                                    | 26.3 (6.4)                              | 26.3 (5.9)                                  |
| US region, <i>n</i> (%)                     | 69 (34.8)                               | 67 (32.4)                                     | 53 (27.3)                                     | 82 (40.6)                               | 271 (33.8)                                  |
| Prior DMT, <i>n</i> (%)                     | 124 (62.6)                              | 130 (62.8)                                    | 113 (58.2)                                    | 144 (71.3)                              | 511 (63.8)                                  |
| Time since diagnosis, years, mean (SD)      | 8.9 (7.8)                               | 7.6 (6.7)                                     | 6.5 (6.1)                                     | 7.7 (6.6)                               | 7.7 (6.9)                                   |
| No. of relapses in previous year, mean (SD) | 0.7 (0.7)                               | 0.7 (0.9)                                     | 0.8 (0.8)                                     | 0.7 (0.7)                               | 0.7 (0.8)                                   |
| EDSS score, mean (SD)                       | 2.8 (1.5)                               | 2.6 (1.5)                                     | 2.7 (1.4)                                     | 2.7 (1.4)                               | 2.7 (1.4)                                   |
| No. of Gd <sup>+</sup> lesions, mean (SD)   | 1.0 (2.3)                               | 0.9 (2.1)                                     | 1.4 (5.4)                                     | 1.2 (3.9)                               | 1.1 (3.6)                                   |
| Gd <sup>+</sup> lesion free, <i>n</i> (%)   | 137 (70.6)                              | 143 (70.4)                                    | 131 (68.6)                                    | 140 (69.7)                              | 551 (69.8)                                  |

ALC absolute lymphocyte count, BMI body mass index, DMT disease-modifying therapy, EDSS expanded disability status score, Gd<sup>+</sup> gadolinium-enhancing, Q quartile

<sup>1</sup> The population includes subjects with non-missing lymphocyte count at baseline and week 96 in the safety population.

<sup>2</sup> “Other” race includes Asian, American Indian, Alaska Native, Native Hawaiian, or other Pacific Islander, and multiple races; subjects who reported multiple races including White were included in White subgroup.

**Table S2** Subgroup analysis 1: summary of subjects with number of relapses by quartiles of % ALC decline (safety population)

|                                            | Q1<br>(≥ 47% decline)<br><i>n</i> = 198 | Q2<br>(30 to < 47% decline)<br><i>n</i> = 207 | Q3<br>(12 to < 30% decline)<br><i>n</i> = 194 | Q4<br>(< 12% decline)<br><i>n</i> = 202 | All patients <sup>1</sup><br><i>N</i> = 801 |
|--------------------------------------------|-----------------------------------------|-----------------------------------------------|-----------------------------------------------|-----------------------------------------|---------------------------------------------|
| No. of patients with relapse, <i>n</i> (%) |                                         |                                               |                                               |                                         |                                             |
| 0                                          | 166 (83.8)                              | 177 (85.5)                                    | 162 (83.5)                                    | 155 (76.7)                              | 660 (82.4)                                  |
| 1                                          | 22 (11.1)                               | 25 (12.1)                                     | 24 (12.4)                                     | 35 (17.3)                               | 106 (13.2)                                  |
| 2                                          | 10 (5.1)                                | 5 (2.4)                                       | 5 (2.6)                                       | 7 (3.5)                                 | 27 (3.4)                                    |
| 3                                          | 0                                       | 0                                             | 1 (0.5)                                       | 5 (2.5)                                 | 6 (0.7)                                     |
| ≥ 4                                        | 0                                       | 0                                             | 2 (1.0)                                       | 0                                       | 2 (0.2)                                     |

ALC absolute lymphocyte count, Q quartile

<sup>1</sup> The population includes subjects with non-missing lymphocyte count at baseline and week 96 in the safety population.
